# Supplementary material for: Homologous-targeting biomimetic nanoparticles co-loaded with melittin and a photosensitizer for the combination therapy of triple negative breast cancer
Source: Royal Society of Chemistry journal article supplement (doi:10.1039/d3tb02919k), 2024-01-01
Supplement: d3tb02919k1.pdf [file d3tb02919k1.pdf]

# **Homologous-targeting biomimetic nanoparticles co-loaded with melittin and a photosensitizer for the combination therapy of triple negative breast cancer**

Tao Zhang<sup>a,b,1</sup>, Liya Bai<sup>a,1</sup>, Ran You<sup>a</sup>, Meng Yang<sup>a</sup>, Qian Chen<sup>a</sup>, Yuanyuan Cheng<sup>a</sup>, Zhanyin Qian<sup>a</sup>, Yinsong Wang<sup>a,\*</sup> and Yuanyuan Liu<sup>a,\*</sup>

<sup>a</sup> *Key Laboratory of Immune Microenvironment and Disease (Ministry of Education), The Province and Ministry Co-sponsored Collaborative Innovation Center for Medical Epigenetics, Tianjin Key Laboratory on Technologies Enabling Development of Clinical Therapeutics and Diagnostics (Theranostics), School of Pharmacy; Department of Genetics, School of Basic Medical Sciences, Tianjin Medical University, Tianjin 300070, China*

<sup>b</sup> *Department of Pharmacy, Tianjin First Central Hospital, Tianjin 300192, China*

<sup>1</sup> These two authors contributed equally to this work.

\* Corresponding authors

*E-mail addresses:* liuyuan01@tmu.edu.cn (Y. Liu), wangyinsong@tmu.edu.cn (Y. Wang)

## **Materials and methods**

### **Materials**

Monoclonal antibodies against CD11c-PE, CD62L-APC, and CD44-PE were provided by eBioscience (San Diego, CA, USA). Monoclonal antibodies against CD80-FITC, CD86-APC, and Rabbit anti-CD31 polyclonal antibody were obtained from Abcam (Cambridge, UK). Monoclonal antibodies against Ki67, CD8, and Alexa-Fluor 647-labeled goat anti-rabbit secondary antibodies were purchased from Invitrogen (Carlsbad, NM, USA). Rabbit anti-HMGB1 antibody and Rabbit anti-calreticulin/AF488 antibody were provided by Biosynthesis Biotechnology (Beijing, China). Singlet oxygen sensor green (SOSG), LIVE/DEAD cell imaging kit, Annexin-V-FITC/PI cell apoptosis kit, Coomassie brilliant blue methylthiazolyldiphenyl-tetrazolium bromide (MTT), hematoxylin & eosin (H&E) and TNF- $\alpha$ , IFN- $\gamma$  ELISA kit were bought from Meilun Biotech (Dalian, China).

### **Cellular uptake and homologous tumor targeting ability of MDM@TPP nanoparticles**

#### *in vitro*

The specific uptake of the MDM@TPP nanoparticles was assessed by confocal microscopy and flow cytometry. Briefly, the HUVECs, Hepa1-6 cells and 4T1 cells were seeded into 12-well plates equipped with glass coverslips and then were incubated with TPP nanoparticles or MDM@TPP nanoparticles for 4 h. Afterward, these cells were stained with DAPI and observed under a confocal microscope. Moreover, the fluorescence intensity of intracellular mTHPC was detected by flow cytometry.

### **Penetration of MDM@TPP nanoparticles into tumor spheroids**

According to the previous reported method, we constructed 3D tumor cell spheroids and then cultured them with MDM@TPP nanoparticles. After incubation for 6 h and 12 h, the

fluorescence localization of mTHPC in the tumor spheroids was observed and photographed using a confocal microscope.

### **Live/dead cell staining and cell apoptosis assay**

To visually observe the cytotoxicity of the above treatments, the cells were evaluated by live/dead cell staining. Briefly, 4T1 cells were seeded in 12-well plates at a density of  $6 \times 10^4$  cells per well and incubated for 24 h. Then, the cells were cultured with mTHPC, TPP nanoparticles or MDM@TPP nanoparticles. In the NIR laser irradiation groups, the cells were exposed to a 652 nm laser and then cultured for an additional 24 h. After processing with the reagents of the LIVE/DEAD cell staining kit, the cells were observed under a confocal microscope.

4T1 cells were seeded into 12-well plates at a density of  $8 \times 10^4$  cells per well and cultured for 24 h. The cells were then incubated with Mel, MDM, mTHPC, TPP nanoparticles or MDM@TPP nanoparticles. In the NIR laser irradiation groups, the cells were exposed to a 652 nm laser. After incubation for another 24 h, the collected cells were stained with the reagents of an Annexin-V-FITC/PI apoptosis kit and analyzed using a flow cytometer.

### **ICD effect of MDM@TPP nanoparticles**

The exposure of calreticulin (CRT) was analyzed in 4T1 cells using FACS analysis and immunofluorescence staining. In brief, 4T1 cells were incubated with therapeutic agents and irradiated with a laser as described above. Then, the cells were stained with anti-calreticulin/AF488 antibody (1:200) for 40 min, analyzed with a flow cytometer and imaged with a confocal microscope. The intracellular release of HMGB1 was detected by

immunofluorescence staining. After receiving various treatments, the cells were separately incubated with a primary rabbit anti-HMGB1 polyclonal antibody overnight at 4 °C, followed by processing with a secondary FITC-labeled goat anti-rabbit antibody. Finally, the cells were stained with DAPI and observed under a confocal microscope.

#### ***In vitro* evaluation of bone marrow-derived dendritic cells (BMDCs) maturation**

BMDCs were collected from normal female BALB/c mice bone marrow and cultured according to the previous method. First, 4T1 cells were inoculated in 12-well plates and treated with mTHPC, Mel, MDM, TPP nanoparticles or MDM@TPP nanoparticles. The cells were partially given the laser irradiation and cultured for an additional 24 h. Next, the antigen-containing supernatant from each well was collected and added to BMDCs inoculated in 12-well plates. After incubation for 24 h, the cells were costained with anti-CD80-FITC and anti-CD86-APC antibodies. Finally, the expression levels of the costimulatory molecules CD80 and CD86 were determined by flow cytometry.

#### ***In vivo* biodistribution and PDT efficacy study**

The biodistribution and TNBC targeting ability of MDM@TPP nanoparticles was assessed in 4T1 tumor-bearing mice using a fluorescence imaging system (PerkinElmer, Waltham, USA). The mice were injected with the normal saline (the control), mTHPC, TPP nanoparticles or MDM@TPP nanoparticles via the tail vein. At 6 h, 12 h, 24 h and 48 h after administration, the mice were sacrificed, and their main organs and tumors were observed by a fluorescence imaging system.

We further evaluated the PDT efficacies of mTHPC, TPP nanoparticles and MDM@TPP nanoparticles combined with laser irradiation in 4T1 tumor-bearing mice using

the singlet oxygen probe SOSG. Twenty hours after injection of therapeutic agents, the mice were injected intratumorally with 50  $\mu$ L of 50  $\mu$ M SOSG and subsequently received laser irradiation at the tumor site. The mice were sacrificed to collect the tumors, and the intensity of green fluorescence was observed by fluorescence microscopy.

### **Evaluation of the synergistic antitumor effects *in vivo***

Bilateral tumor models were established on both sides of the backs of mice back as primary and distal tumors 7 d and 1 d before treatment, respectively. When the 4T1-Luc primary tumors grew to approximately 60 mm<sup>3</sup>, the mice were randomly divided into 8 groups with 10 mice in each group. Normal saline (control), MDM, mTHPC, TPP nanoparticles or MDM@TPP nanoparticles were injected intravenously. At 24 h after administration, the primary tumors of the mice in the NIR laser irradiation group were treated with 652 nm laser irradiation. The mice were further treated with radiation twice a day for 7 consecutive days during the entire treatment period, and the volumes of both the primary and distal tumors and body weights were recorded every 2 d.

We collected the main organs of the mice in each group at the end of treatment and observed 4T1 cell metastasis with a luminescence imaging system. Furthermore, sections of these tissues were stained with H&E. The primary tumor sections were processed separately with antibodies against Ki67 and CD31. Based on the manufacturer's protocols, the cells were then stained with HRP-linked secondary antibody. These stained tissue sections were observed by microscopy. To evaluate memory antitumor immunity, spleens selected from 3 mice were digested to obtain single-cell suspensions. These cells were stained with anti-CD62L-APC and anti-CD44-PE antibodies and detected by flow cytometry.

In addition, immunofluorescence and ELISA analyses of serum were used to analyze the extent of immune activation in the treated mice 48 h after the first therapeutic agents were combined with laser irradiation. Three mice selected randomly from each group were sacrificed 2 d after one treatment, and their tumors, spleens and blood samples were collected for the following examinations. Specifically, we ground and digested the collected spleen tissues to obtain single-cell suspensions. Then, these cells were separately coincubated with anti-CD3-FITC, anti-CD4-PE and anti-CD8-APC antibodies according to the manufacturers' protocols. Finally, all stained cells were analyzed using a flow cytometer. We further analyzed the secretion levels of IFN- $\gamma$  and TNF- $\alpha$  in the serum of the abovementioned mice with ELISA kits.

## Figures

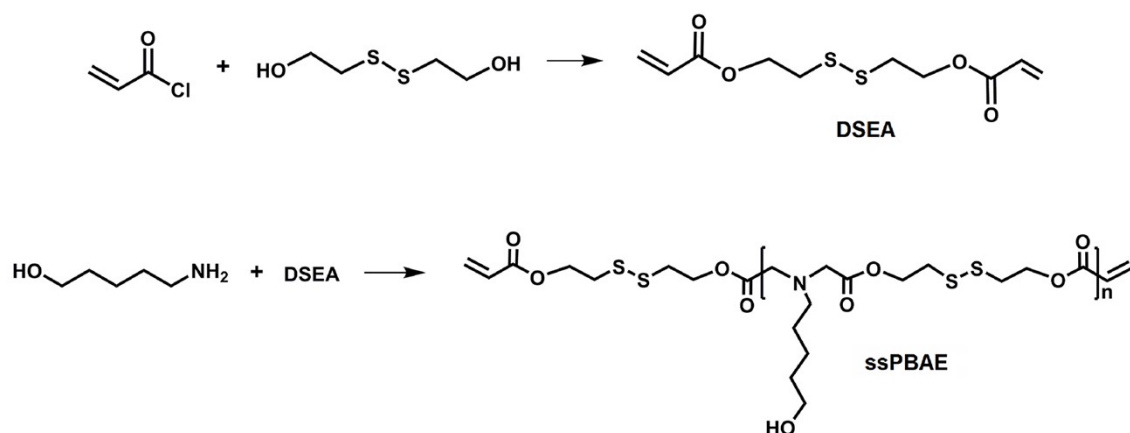

**Figure S1.** Illustration for the synthesis route of ssPBAE.

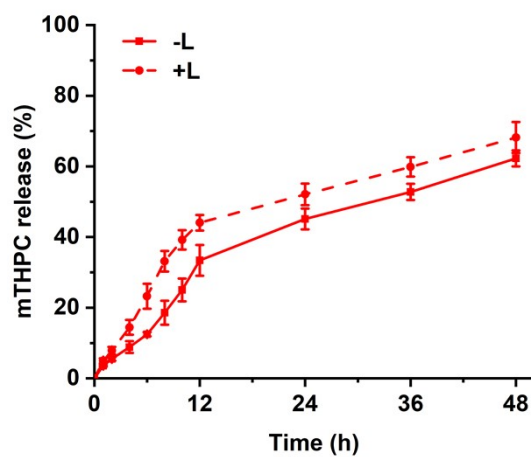

**Figure S2.** The *in vitro* release of mTHPC from MDM@TPP nanoparticles at PBS solution with pH value 7.4 with or without laser irradiation.

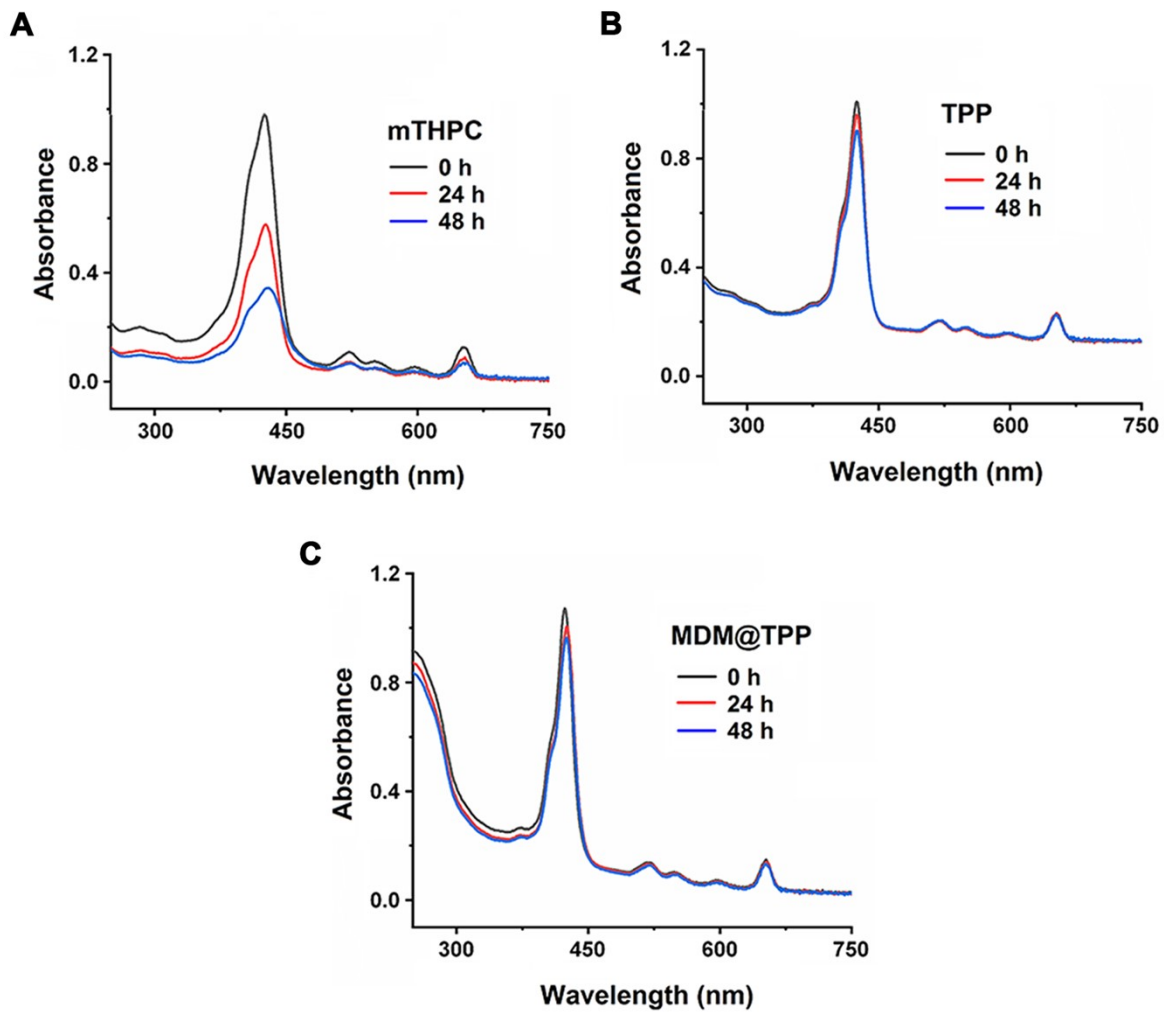

**Figure S3.** The UV spectra changes of mTHPC (A), TPP nanoparticles (B) and MDM@TPP nanoparticles (C) during 48 h storage.

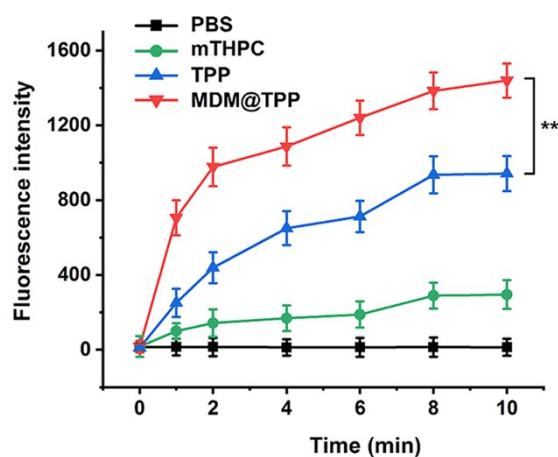

**Figure S4.** The ROS generation of PBS, mTHPC, TPP nanoparticles and MDM@TPP nanoparticles after laser irradiation ( $n=3$ ). \*\* represents comparison between two groups  $P < 0.01$ .



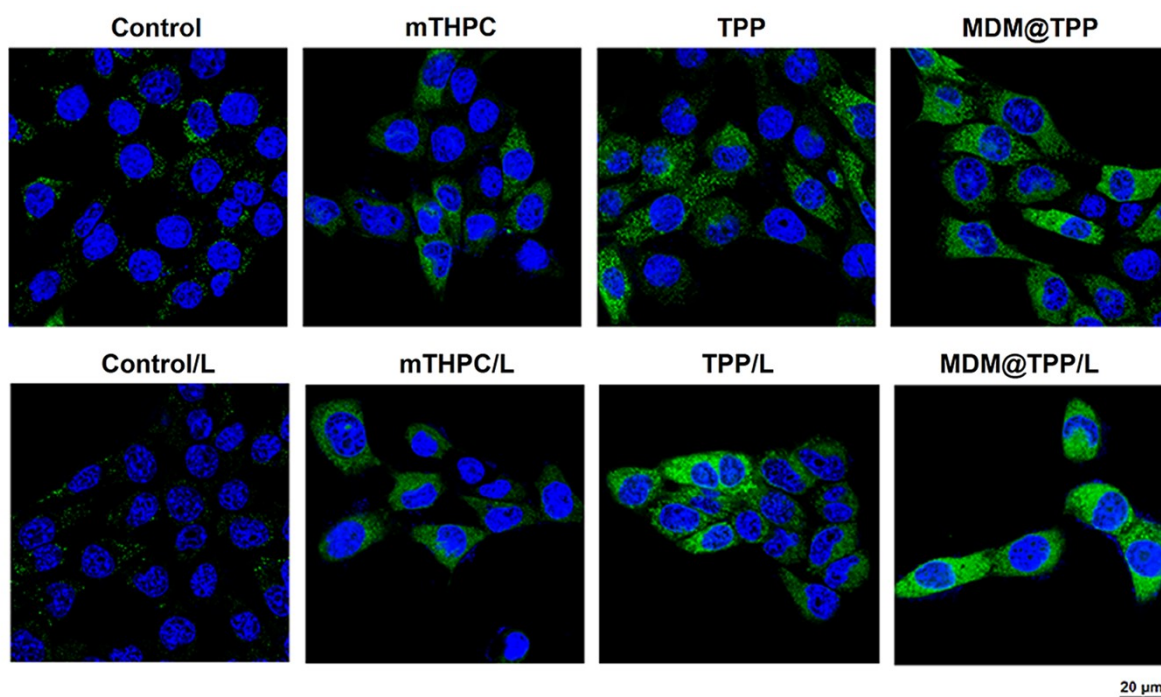

**Figure S5.** The confocal microscopic images of 4T1 cells treated with free mTHPC, TPP nanoparticles and MDM@TPP nanoparticles alone and with laser irradiation. Rhodamine 123 was used as a probe for detecting the mitochondrial membrane potentials with green fluorescence.

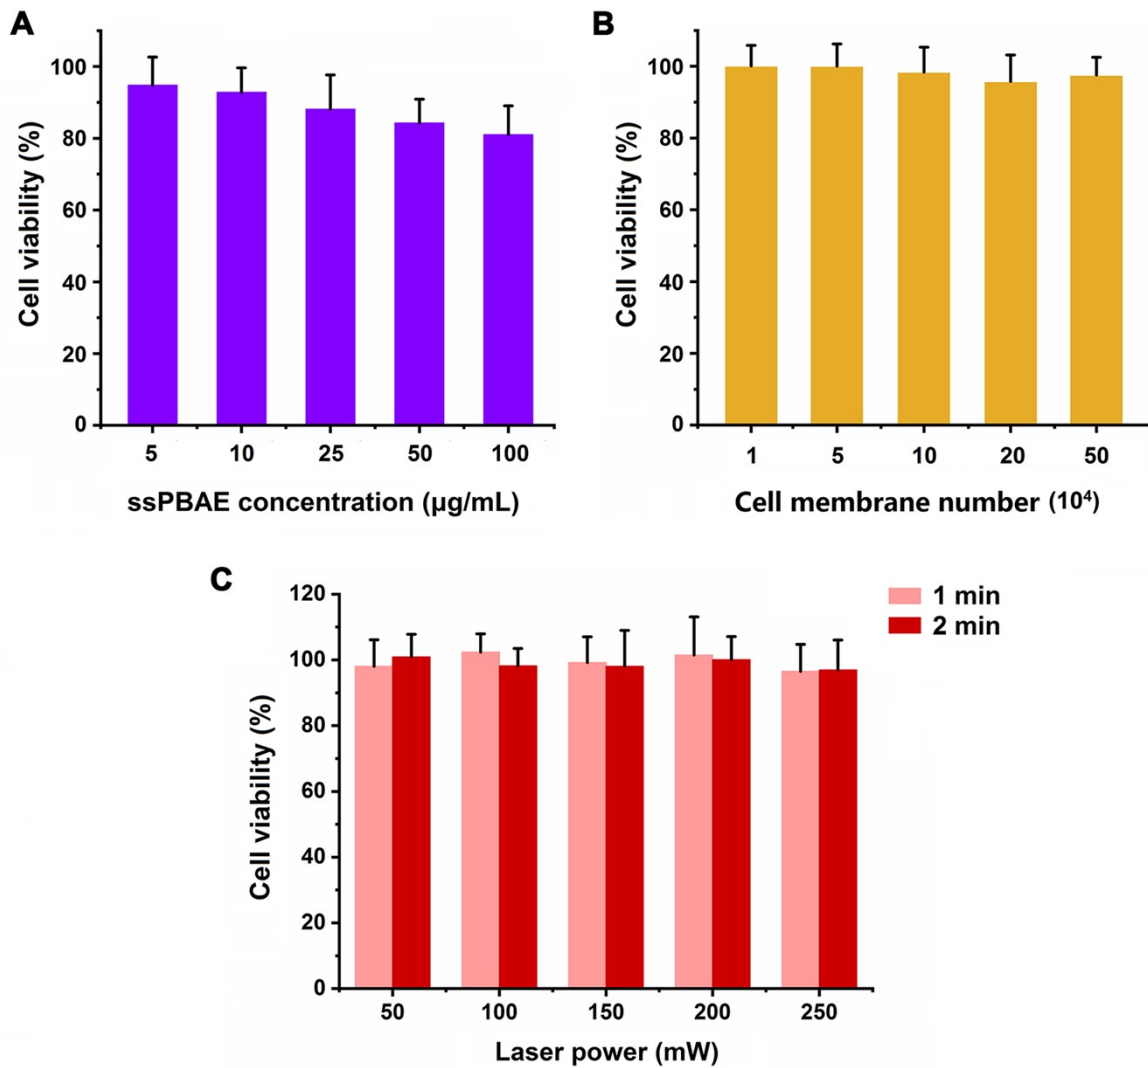

**Figure S6.** Influence of carrier materials and laser irradiation on the growth of 4T1 cells *in vitro*. The cytotoxicity of PLGA/ssPBAE nanoparticles (A) and different amounts of tumor cell membrane (B) co-incubated with 4T1 cells for 24 h. (C) Survival of 4T1 cells 24 h after irradiation.

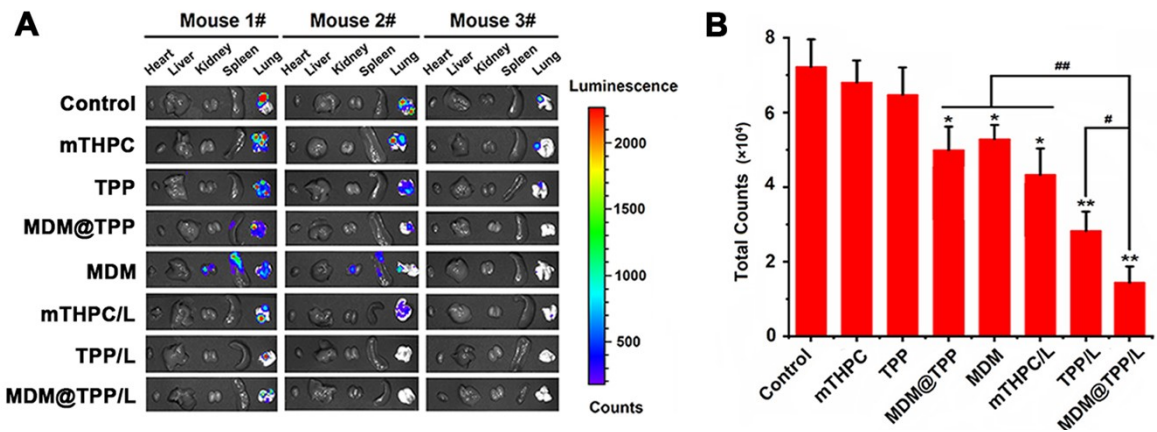

**Figure S7.** Bioluminescence images of tumor metastasis on main organs (heart, liver, spleen, lung and kidney) of mice (A) and luminescence intensity of lung metastases (B) in each treatment group ( $n=3$ ). \* and \*\* represents comparison with control group  $P < 0.05$  and  $P < 0.01$ . # and ## represents comparison between two groups  $P < 0.05$  and  $P < 0.01$ .

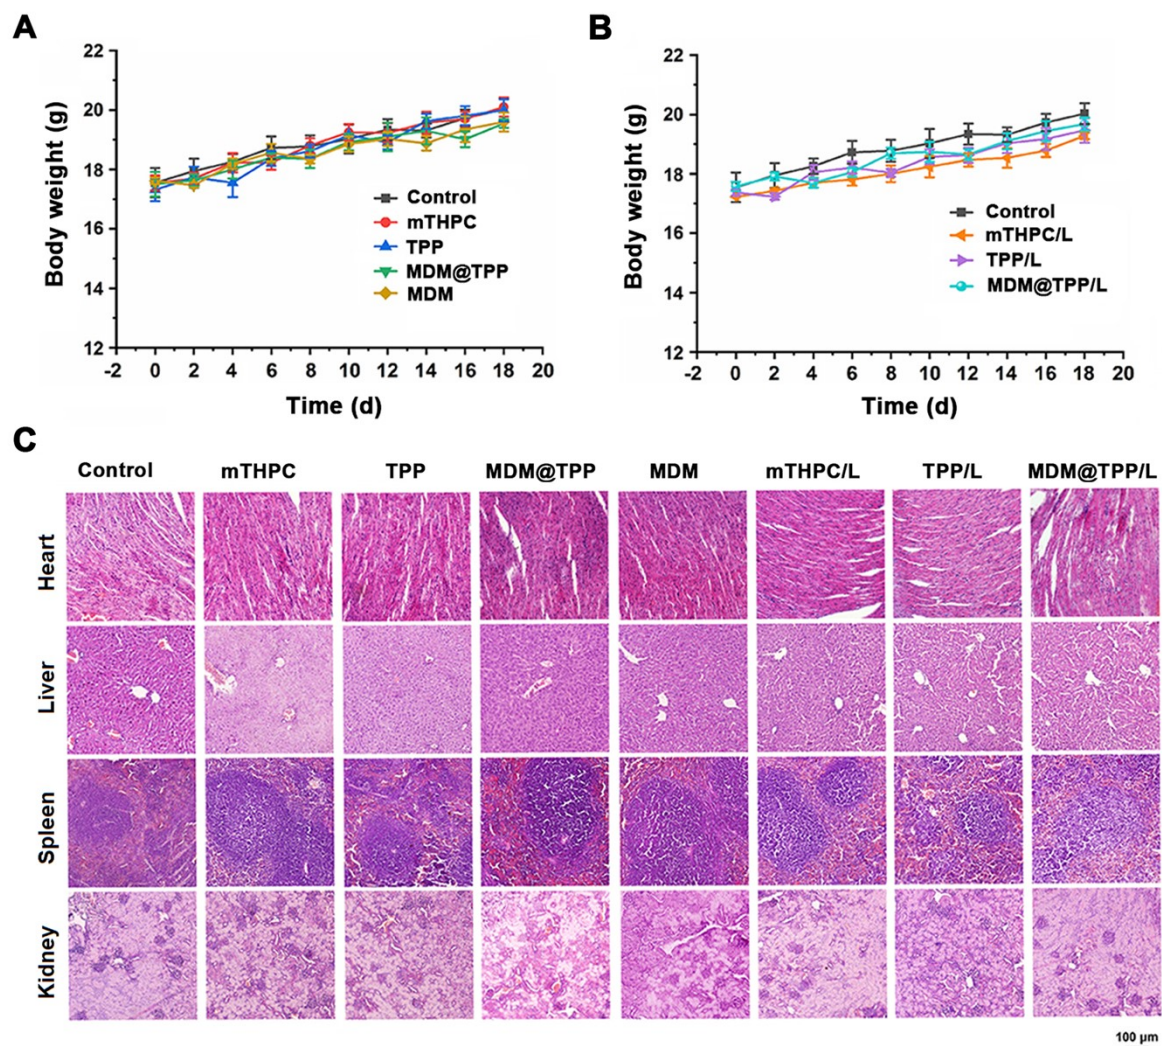

**Figure S8.** The body weight change curves (A, B) of tumor-bearing mice during treatment.

(C) The H&E staining microscopic images of main organs (heart, liver, spleen and kidney) of mice after treatment.

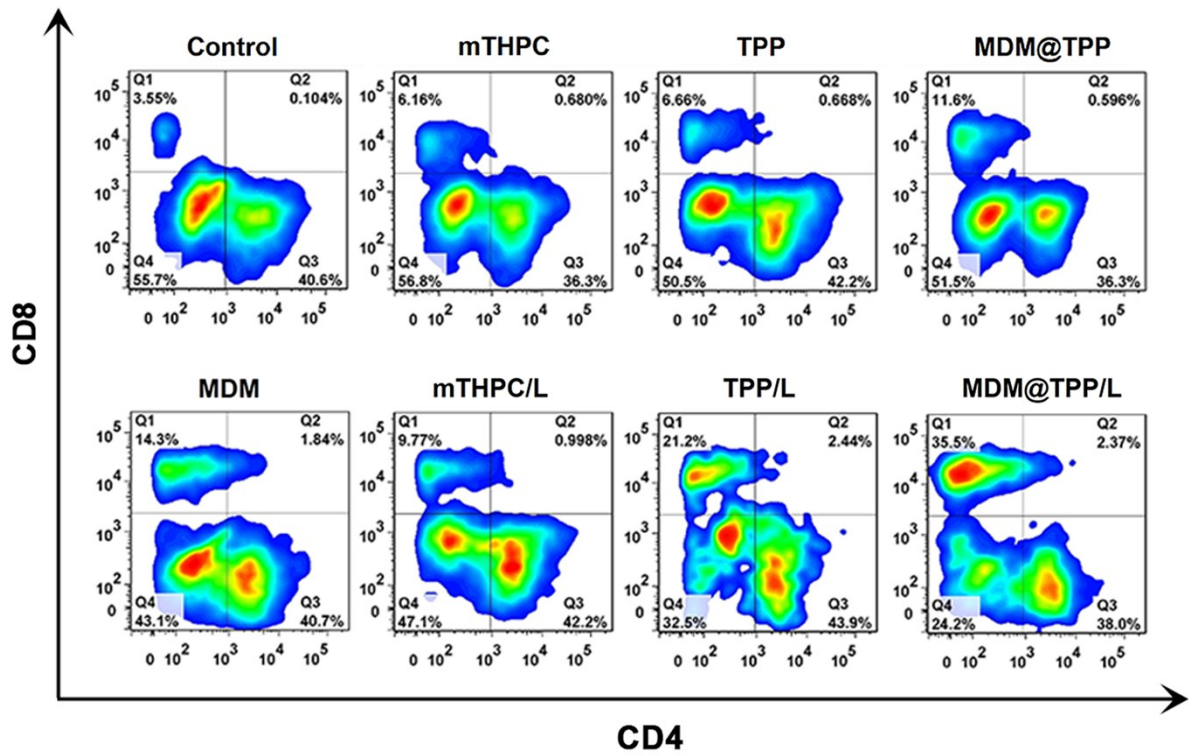

**Figure S9.** Flow cytometry analysis of CD4<sup>+</sup> T lymphocytes and CD8<sup>+</sup> T lymphocytes of primary tumors in each treatment group.
